# Supplementary material for: What makes administrative data “research-ready”? A systematic review and thematic analysis of published literature
Source: PubMed Central journal article supplement — Int J Popul Data Sci. 2022 Apr 27;7(1):1718. doi: 10.23889/ijpds.v7i1.1718 (PMC9052961; doi:10.23889/ijpds.v7i1.1718), 2022-04-27

Supplementary Table 1: Search strings used in systematic review

| <b>Main search (28<sup>th</sup> June 2021)</b>         |                                                                                                                                                                                                            |
|--------------------------------------------------------|------------------------------------------------------------------------------------------------------------------------------------------------------------------------------------------------------------|
| <b>Electronic database</b>                             | <b>String</b>                                                                                                                                                                                              |
| Embase (via Ovid)                                      | ("research-ready" or "research ready") AND (administrative OR operational OR routinely-collected OR "routinely collected" OR records OR data?)                                                             |
| MEDLINE (via Ovid)                                     | ("research-ready" or "research ready") AND (administrative OR operational OR routinely-collected OR "routinely collected" OR records OR data?)                                                             |
| PubMed                                                 | ("research-ready" or "research ready") AND (administrative OR operational OR routinely-collected OR "routinely collected" OR records OR data?)                                                             |
| Scopus                                                 | ALL ( ( {research-ready} OR {research ready} ) AND (administrative OR operational OR {routinely-collected} OR {routinely collected} OR records OR data* ) )                                                |
| ProQuest Central                                       | ft(research N/0 ready) AND ft(administrative OR operational OR (routinely N/0 collected) OR records OR data* ) NOT ab(pilot OR experiment* OR participants OR randomised) RESTRICTED TO scholarly journals |
| CINAHL Plus                                            | TX ("research ready") AND TX ( administrative OR operational OR "routinely collected" OR records OR data* ) )                                                                                              |
| Web of Science Core Collection                         | ALL = (research-ready) AND ALL = (administrative OR operational OR "routinely collected" OR records OR data* )                                                                                             |
| <b>Supplementary search (7<sup>th</sup> July 2021)</b> |                                                                                                                                                                                                            |
| <b>Website</b>                                         | <b>String</b>                                                                                                                                                                                              |
| Google Scholar                                         | ("research-ready" or "research ready") AND (administrative OR operational OR routinely-collected OR "routinely collected" OR records OR data?)                                                             |
| International Journal of Population Data Science       | (" research-ready" OR "research ready")                                                                                                                                                                    |

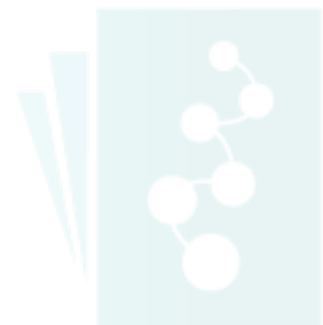

Supplement: ijpds-07-1718-s001.pdf [file ijpds-07-1718-s001.pdf]
